# Supplementary material for: Multivalent insulin receptor activation using insulin–DNA origami nanostructures
Source: PubMed Central journal article supplement (PMC10873203; doi:10.1038/s41565-023-01507-y), 2023-10-09

## Source Data for Fig.2

Fig. 2c

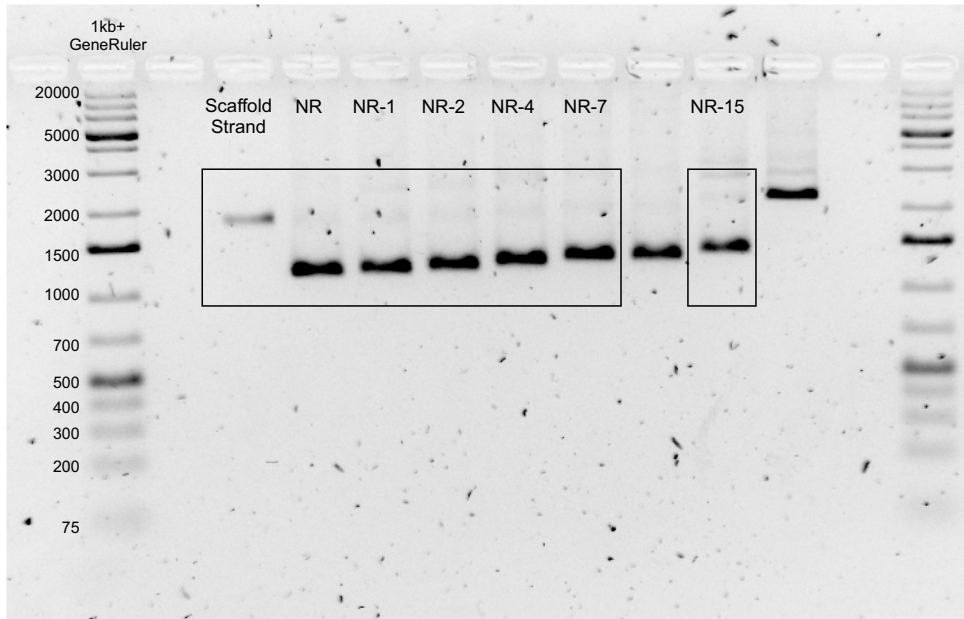

Supplement: 41565_2023_1507_MOESM6_ESM.pdf [file 41565_2023_1507_MOESM6_ESM.pdf]
