# Supplementary material for: Multivalent insulin receptor activation using insulin–DNA origami nanostructures
Source: PubMed Central journal article supplement (PMC10873203; doi:10.1038/s41565-023-01507-y), 2023-10-09

## Source Data for Extended Data Fig. 4

Extended Data Fig. 4f

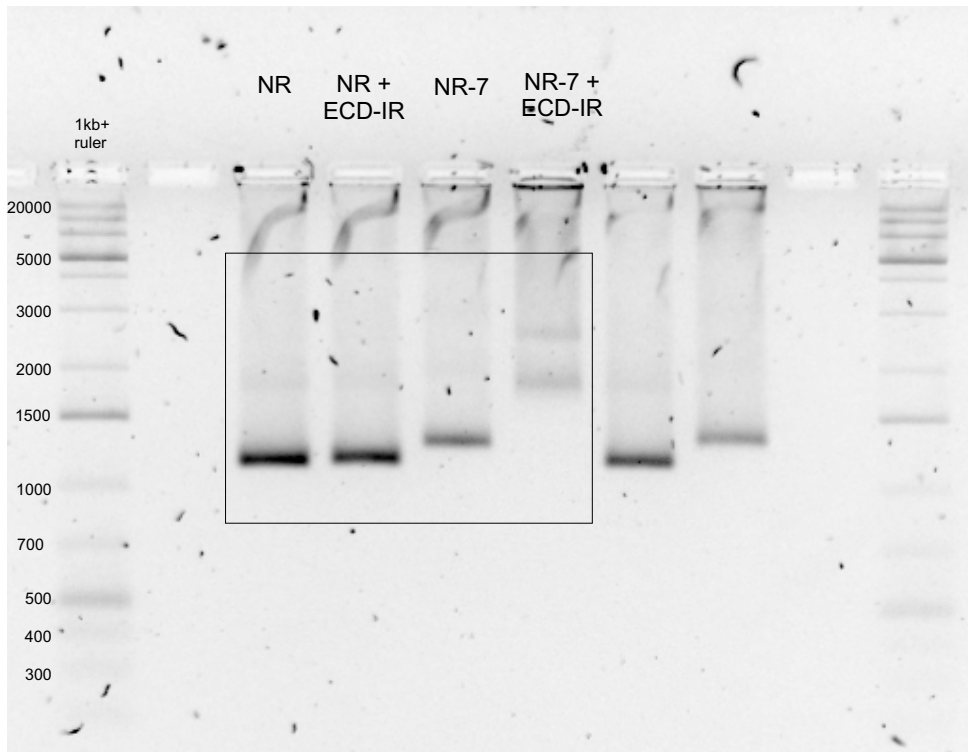

Supplement: 41565_2023_1507_MOESM15_ESM.pdf [file 41565_2023_1507_MOESM15_ESM.pdf]
