# Supplementary material for: Multivalent insulin receptor activation using insulin–DNA origami nanostructures
Source: PubMed Central journal article supplement (PMC10873203; doi:10.1038/s41565-023-01507-y), 2023-10-09
Supplement: 41565_2023_1507_MOESM17_ESM.pdf [file 41565_2023_1507_MOESM17_ESM.pdf]

## Source Data for Extended Data Fig. 5

### Extended Data Fig. 5a

Colorimetric image of membrane

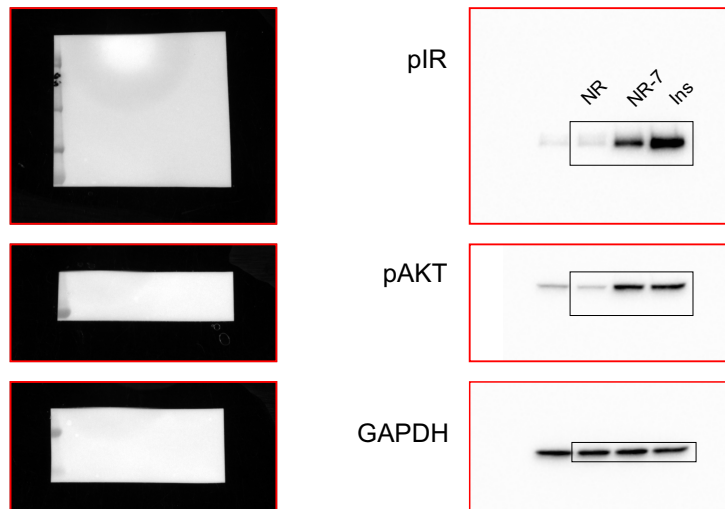

Membranes were cut before incubation with primary antibody using the pre-stained molecular weights as a guide. Membranes were also imaged ("Colorimetric image of membrane"). Bands presented in Extended Data Fig. 5a are indicated by black boxes.
